# Supplementary material for: SBA-15 Mesoporous Silica as Delivery Vehicle for rhBMP-2 Bone Morphogenic Protein for Dental Applications
Source: MDPI journal article supplement (doi:10.3390/nano12050822), 2022-02-28
Supplement: s1 [file s1]

# SBA-15 Mesoporous Silica as Delivery Vehicle for rhBMP-2 Bone Morphogenic Protein for Dental Applications

Dimitrios Gkiliopoulos <sup>1,2</sup>, Ioannis Tsamesidis <sup>3</sup>, Anna Theocharidou <sup>3</sup>, Georgia K. Pouroutzidou <sup>3,4</sup>, Evi Christodoulou <sup>5</sup>, Evangelia Stalika <sup>3</sup>, Konstantinos Xanthopoulos <sup>6</sup>, Dimitrios Bikiaris <sup>5</sup>, Konstantinos Triantafyllidis <sup>1,2</sup> and Eleana Kontonasaki <sup>3,\*</sup>

- <sup>1</sup> Laboratory of Chemical and Environmental Technology, Department of Chemistry, Aristotle University of Thessaloniki, GR-54124 Thessaloniki, Greece; dgiliopo@chem.auth.gr (D.G.); ktrianta@chem.auth.gr (K.T.)
  - <sup>2</sup> Center for Interdisciplinary Research and Innovation (CIRI-AUTH), Balkan Center, 57001 Thessaloniki, Greece
  - <sup>3</sup> Department of Prosthodontics, School of Dentistry, Faculty of Health Sciences, Aristotle University of Thessaloniki, GR-54124 Thessaloniki, Greece; itsamesidis@auth.gr (I.T.); antheo@dent.auth.gr (A.T.); gpourout@physics.auth.gr (G.K.P.); evangelia.stalika@gmail.com (E.S.)
  - <sup>4</sup> Laboratory of Advanced Materials and Devices (AMDeLab), School of Physics, Faculty of Sciences, Aristotle University of Thessaloniki, GR-54124 Thessaloniki, Greece
  - <sup>5</sup> Laboratory of Polymer Chemistry and Technology, Department of Chemistry, Aristotle University of Thessaloniki, GR-54124 Thessaloniki, Greece; evicius@gmail.com (E.C.); dbic@chem.auth.gr (D.B.)
  - <sup>6</sup> Laboratory of Pharmacology, School of Pharmacy, Faculty of Health Sciences, Aristotle University of Thessaloniki, GR-54124 Thessaloniki, Greece; xantho@pharm.auth.gr
- \* Correspondence: kont@dent.auth.gr

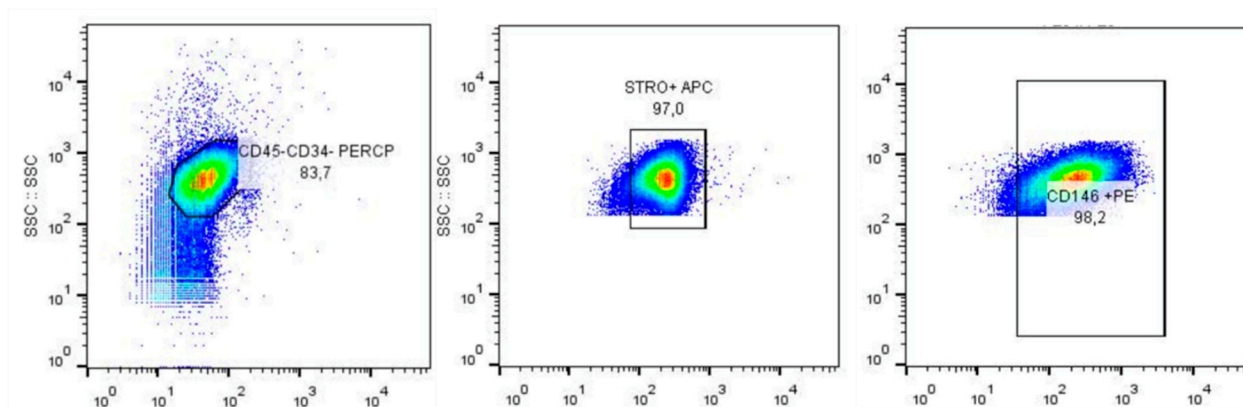

**Figure S1.** Representative flow cytometric density plot of hPDLs using as reference markers: C45-C34, STRO-1 and CD146. The 83.7% of the cells were double negative for the hematopoietic markers C45-C34, 97% of these cells expressed STRO-1 and 98.2% CD146, proving the stem cell properties of human periodontal ligament cells.
